# Supplementary material
Source: PubMed Central journal article supplement (PMC3128155)
Supplement: cto0194-0001-s02.pdf [file cto0194-0001-s02.pdf]

| <b>Supplemental Table 1: Statistical Analysis of GFP-Positive Cells Counting Data</b> |                    |                                 |          |                                           |                                       |                                      |                                        |
|---------------------------------------------------------------------------------------|--------------------|---------------------------------|----------|-------------------------------------------|---------------------------------------|--------------------------------------|----------------------------------------|
| <b>Figure Number</b>                                                                  | <b>AVC or Vent</b> | <b>Condition</b>                | <b>N</b> | <b>Total Number of GFP-positive cells</b> | <b>Number of Epithelial Cells (%)</b> | <b>Number of Activated Cells (%)</b> | <b>Number of Transformed Cells (%)</b> |
| <b>Figure 1F</b>                                                                      | Vent               | GFP, 200pM TGFβ2, control siRNA | 24       | 956                                       | 737 (77±1.4%)                         | 111 (12±0.4%)                        | 108 (11±0.9%)                          |
|                                                                                       | Vent               | TGFβR3, TGFβ2, control siRNA    | 23       | 957                                       | 431 (45±2.0%)                         | 107 (11±1.5%)                        | 419 (44±0.6%)                          |
|                                                                                       | Vent               | GFP, TGFβ2, Smad4A siRNA        | 24       | 960                                       | 753 (78±1.6%)                         | 105 (11±1.0%)                        | 102 (11±0.6%)                          |
|                                                                                       | Vent               | GFP, TGFβ2, Smad4B siRNA        | 24       | 867                                       | 696 (80±0.8%)                         | 83 (10±0.6%)                         | 88 (10±0.4%)                           |
|                                                                                       | Vent               | TGFβR3, TGFβ2, Smad4A siRNA     | 24       | 765                                       | 581 (76±1.3%)                         | 90 (12±1.0%)                         | 94 (12±1.2%)                           |
|                                                                                       | Vent               | TGFβR3, TGFβ2, Smad4B siRNA     | 24       | 765                                       | 603 (79±1.4%)                         | 83 (11±0.7%)                         | 79 (11±1.3%)                           |
| <b>Figure 1G</b>                                                                      | Vent               | GFP, 5 nM BMP-2, control siRNA  | 23       | 763                                       | 609 (80±1.2%)                         | 71 (9±0.4%)                          | 83 (11±1.7%)                           |
|                                                                                       | Vent               | TGFβR3, BMP-2, control siRNA    | 23       | 914                                       | 437 (48±0.7%)                         | 89 (10±0.6%)                         | 388 (42±0.3%)                          |
|                                                                                       | Vent               | GFP, BMP-2, Smad4A siRNA        | 24       | 863                                       | 708 (82±1.6%)                         | 72 (8±0.7%)                          | 83 (10±1.1%)                           |
|                                                                                       | Vent               | GFP, BMP-2,                     | 24       | 846                                       | 690 (81±1.7%)                         | 76 (9±1.1%)                          | 80 (10±0.6%)                           |

|                  |      |                                             |    |      |                     |                  |                     |
|------------------|------|---------------------------------------------|----|------|---------------------|------------------|---------------------|
|                  |      | Smad4B<br>siRNA                             |    |      |                     |                  |                     |
|                  | Vent | TGFβR3,<br>BMP-2,<br>Smad4A<br>siRNA        | 24 | 556  | 419<br>(75±2.3%)    | 65<br>(12±1.3%)  | 72 (13±1.8%)        |
|                  | Vent | TGFβR3,<br>BMP-2,<br>Smad4B<br>siRNA        | 24 | 514  | 404<br>(79±1.3%)    | 50<br>(10±1.5%)  | 60 (12±1.9%)        |
| <b>Figure 2C</b> | Vent | GFP                                         | 39 | 1643 | 1096<br>(67±2.6%)   | 182<br>(11±1.4%) | 365<br>(22±1.8%)    |
|                  | Vent | Smad1                                       | 39 | 1292 | 755<br>(57±4.3%)    | 170<br>(14±1.3%) | 367<br>(29±3.6%)    |
| <b>Figure 2D</b> | Vent | GFP                                         | 34 | 1159 | 770<br>(66±0.5%)    | 155<br>(13±0.4%) | 234<br>(20±0.6%)    |
|                  | Vent | Smad3                                       | 36 | 971  | 643<br>(66±1.6%)    | 121<br>(12±0.1%) | 207<br>(21±1.7%)    |
| <b>Figure 3A</b> | Vent | GFP,<br>200pM<br>TGFβ2,<br>control<br>siRNA | 25 | 1103 | 869<br>(79±2.3%)    | 116<br>(11±1.5%) | 118<br>(11±0.9%)    |
|                  | Vent | TGFβR3,<br>TGFβ2,<br>control<br>siRNA       | 23 | 716  | 332<br>(46±1.1%)*** | 76<br>(11±1.9%)  | 308<br>(43±1.2%)*** |
|                  | Vent | GFP,<br>TGFβ2,<br>Par6cA<br>siRNA           | 25 | 993  | 748<br>(75±3.5%)    | 133<br>(14±2.0%) | 112<br>(12±1.7%)    |
|                  | Vent | GFP,<br>TGFβ2,<br>Par6cB<br>siRNA           | 24 | 910  | 706<br>(78±0.9%)    | 101<br>(11±0.1%) | 103<br>(11±0.8%)    |
|                  | Vent | TGFβR3,<br>TGFβ2,<br>Par6cA<br>siRNA        | 24 | 687  | 541<br>(79±1.4%)*** | 75<br>(11±1.1%)  | 71<br>(10±0.4%)***  |
|                  | Vent | TGFβR3,<br>TGFβ2,<br>Par6cB<br>siRNA        | 24 | 744  | 572<br>(77±2.0%)*** | 91<br>(12±2.0%)  | 81<br>(11±0.6%)***  |
| <b>Figure 3B</b> | Vent | GFP,<br>200pM<br>TGFβ2,<br>control          | 23 | 942  | 749<br>(80±3.1%)    | 100<br>(11±1.5%) | 93<br>(10±2.1%)     |

|                  |      |                                 |    |      |                     |                  |                     |
|------------------|------|---------------------------------|----|------|---------------------|------------------|---------------------|
|                  |      | siRNA                           |    |      |                     |                  |                     |
|                  | Vent | TGFβ3, TGFβ2, control siRNA     | 22 | 727  | 354<br>(49±2.5%)*** | 72<br>(10±1.0%)  | 301<br>(41±3.1%)*** |
|                  | Vent | GFP, TGFβ2, Smurf1A siRNA       | 24 | 945  | 702<br>(75±2.3%)    | 124<br>(13±1.9%) | 119<br>(13±0.6%)    |
|                  | Vent | GFP, TGFβ2, Smurf1B siRNA       | 22 | 832  | 645<br>(78±2.0%)    | 93<br>(11±0.9%)  | 94<br>(11±1.1%)     |
|                  | Vent | TGFβ3, TGFβ2, Smurf1A siRNA     | 23 | 673  | 523<br>(78±3.5%)**  | 76<br>(11±1.6%)  | 74<br>(11±2.0%)**   |
|                  | Vent | TGFβ3, TGFβ2, Smurf1B siRNA     | 23 | 758  | 586<br>(77±0.5%)**  | 86<br>(11±1.2%)  | 86<br>(11±1.3%)**   |
|                  |      |                                 |    |      |                     |                  |                     |
| <b>Figure 4A</b> | Vent | GFP, 5 nM BMP-2, vehicle (DMSO) | 30 | 1126 | 849<br>(75±1.1%)    | 142<br>(13±1.4%) | 135<br>(12±0.6%)    |
|                  | Vent | GFP, BMP-2, 2.5 μM SB431542     | 31 | 921  | 768<br>(83±0.7%)    | 72 (8±0.4%)      | 81 (9±0.7%)         |
|                  | Vent | TGFβ3, BMP-2, vehicle           | 28 | 564  | 356<br>(63±2.0%)**  | 52 (9±1.6%)      | 156<br>(28±2.2%)**  |
|                  | Vent | TGFβ3, BMP-2, SB431542          | 28 | 474  | 425<br>(90±0.7%)**  | 25 (5±0.9%)      | 24 (5±0.6%)**       |
|                  |      |                                 |    |      |                     |                  |                     |
| <b>Figure 4C</b> | Vent | GFP, TGFβ2, control siRNA       | 25 | 803  | 631<br>(79±1.7%)    | 77 (9±1.1%)      | 93 (12±0.6%)        |
|                  | Vent | TGFβ3, TGFβ2, control siRNA     | 25 | 1027 | 497<br>(48±1.0%)*** | 85 (8±0.2%)      | 445<br>(43±0.8%)*** |
|                  | Vent | GFP, TGFβ2, ALK5A siRNA         | 25 | 876  | 720<br>(82±0.4%)    | 72<br>(8±0.7%)   | 84<br>(10±1.1%)     |

|                      |      |                                       |    |     |                     |                 |                     |
|----------------------|------|---------------------------------------|----|-----|---------------------|-----------------|---------------------|
|                      | Vent | GFP,<br>TGFβ2,<br>ALK5B<br>siRNA      | 24 | 831 | 720<br>(79±2.1%)    | 72<br>(9±0.4%)  | 84<br>(12±1.7%)     |
|                      | Vent | TGFβR3,<br>TGFβ2,<br>ALK5A<br>siRNA   | 24 | 668 | 529<br>(81±1.8%)*** | 60<br>(9±0.5%)  | 79<br>(10±1.3%)***  |
|                      | Vent | TGFβR3,<br>TGFβ2,<br>ALK5B<br>siRNA   | 23 | 642 | 523<br>(77±1.7%)*** | 56<br>(12±1.3%) | 63<br>(11±1.0)***   |
|                      |      |                                       |    |     |                     |                 |                     |
| <b>Figure<br/>4D</b> | Vent | GFP,<br>BMP-2,<br>control<br>siRNA    | 23 | 763 | 609<br>(80±1.2%)    | 71 (9±0.4%)     | 83 (11±1.7%)        |
|                      | Vent | TGFβR3,<br>BMP-2,<br>control<br>siRNA | 23 | 914 | 437<br>(48±0.7%)*** | 89<br>(10±0.6%) | 388<br>(42±0.3%)*** |
|                      | Vent | GFP,<br>BMP-2,<br>ALK5A<br>siRNA      | 24 | 948 | 764<br>(81±0.7%)    | 91<br>(10±0.5%) | 93<br>(10±0.2%)     |
|                      | Vent | GFP,<br>BMP-2,<br>ALK5B<br>siRNA      | 24 | 904 | 747<br>(83±0.7%)    | 70<br>(8±0.5%)  | 87<br>(10±0.3%)     |
|                      | Vent | TGFβR3,<br>BMP-2,<br>ALK5A<br>siRNA   | 24 | 470 | 361<br>(77±0.6%)*** | 53<br>(11±0.7%) | 56<br>(11±0.9%)***  |
|                      | Vent | TGFβR3,<br>BMP-2,<br>ALK5B<br>siRNA   | 24 | 524 | 403<br>(77±1.7%)**  | 61<br>(12±1.3%) | 60<br>(11±1.0)***   |
|                      |      |                                       |    |     |                     |                 |                     |
| <b>Figure<br/>4E</b> | Vent | GFP,<br>BMP-2,<br>control<br>siRNA    | 24 | 778 | 603<br>(77±1.2%)    | 83<br>(11±1.3%) | 92<br>(12±0.4%)     |
|                      | Vent | GFP,<br>BMP-2,<br>Par6cA<br>siRNA     | 24 | 968 | 779<br>(80±0.6%)    | 82<br>(8±0.4%)  | 107<br>(11±1.1%)    |
|                      | Vent | GFP,<br>BMP-2,<br>Par6cB<br>siRNA     | 24 | 906 | 743<br>(82±0.2%)    | 76<br>(8±0.2%)  | 87<br>(10±0.3%)     |

|                                                                                          |      |                                      |    |     |                     |                  |                     |
|------------------------------------------------------------------------------------------|------|--------------------------------------|----|-----|---------------------|------------------|---------------------|
|                                                                                          | Vent | GFP,<br>BMP-2,<br>Smurf1A<br>siRNA   | 24 | 921 | 740<br>(80±0.8%)    | 87<br>(9±0.3%)   | 94<br>(10±0.6%)     |
|                                                                                          | Vent | GFP,<br>BMP-2,<br>Smurf1B<br>siRNA   | 24 | 896 | 748<br>(84±0.6%)    | 69<br>(8±0.2%)   | 79<br>(9±0.5%)      |
|                                                                                          | Vent | TGFβ3,<br>BMP-2,<br>control<br>siRNA | 24 | 843 | 410<br>(49±1.9%)*** | 80<br>(10±0.4%)  | 353<br>(42±2.2%)**  |
|                                                                                          | Vent | TGFβ3,<br>BMP-2,<br>Par6cA<br>siRNA  | 24 | 538 | 420<br>(78±1.9%)*** | 54<br>(10±0.9%)  | 61<br>(12±1.1%)**   |
|                                                                                          | Vent | TGFβ3,<br>BMP-2,<br>Par6cB<br>siRNA  | 24 | 549 | 430<br>(78±0.9%)*** | 54<br>(10±0.1%)  | 65<br>(12±0.8%)**   |
|                                                                                          | Vent | TGFβ3,<br>BMP-2,<br>Smurf1A<br>siRNA | 24 | 504 | 387<br>(77±0.9%)*** | 63<br>(12±0.8%)  | 54<br>(12±0.2%)**   |
|                                                                                          | Vent | TGFβ3,<br>BMP-2,<br>Smurf1B<br>siRNA | 24 | 515 | 398<br>(77±1.2%)*** | 62<br>(12±0.6%)* | 55<br>(11±0.8%)**   |
|                                                                                          |      |                                      |    |     |                     |                  |                     |
| <b>Figure S1</b>                                                                         | Vent | GFP,<br>vehicle                      | 24 | 780 | 614<br>(79±1.1%)    | 80<br>(10±0.7%)  | 86<br>(11±0.6%)     |
|                                                                                          | Vent | GFP, 200<br>pM<br>TGFβ2              | 23 | 812 | 651<br>(80±1.6%)    | 87<br>(11±0.8%)  | 74<br>(9±0.9%)      |
|                                                                                          | Vent | GFP, 5<br>nM BMP-<br>2               | 25 | 908 | 718<br>(79±0.3%)    | 88<br>(10±0.5%)  | 102<br>(11±1.2%)    |
|                                                                                          | Vent | TGFβ3,<br>vehicle                    | 22 | 617 | 504<br>(82±0.8%)    | 58 (9±1.0%)      | 55<br>(9±1.6%)      |
|                                                                                          | Vent | TGFβ3,<br>TGFβ2                      | 25 | 737 | 324<br>(44±0.9%)*** | 71<br>(10±1.1%)  | 342<br>(46±0.8%)*** |
|                                                                                          | Vent | TGFβ3,<br>BMP-2                      | 24 | 743 | 362<br>(49±1.1%)*** | 89<br>(12±0.7%)  | 292<br>(39±0.2%)*** |
|                                                                                          |      |                                      |    |     |                     |                  |                     |
| Asterisks denote significance as follows: * $P < 0.05$ , ** $P < 0.01$ , *** $P < 0.001$ |      |                                      |    |     |                     |                  |                     |

| Supplemental Table 2. siRNA target sequences |                              |  |
|----------------------------------------------|------------------------------|--|
| ALK5A                                        | 5'(GCUACGACAUGAAAAUUTT)3'    |  |
| ALK5B                                        | 5'(GGAUUAUUGCUGCCUUUUAATT)3' |  |
| Smad1A                                       | 5'(GGAGUUCGCUCAGCUCUJATT)3'  |  |
| Smad1B                                       | 5'(GCAGGGAGAUGAAGAAGAATT)3'  |  |
| Smad2A                                       | 5'(GGAUUGAACUUCAUCUGAATT)3'  |  |
| Smad2B                                       | 5'(CCACCUCCAGGAUAUAUCATT)3'  |  |
| Smad3A                                       | 5'(GGAUGUAACUUGAAUAUUUTT)3'  |  |
| Smad3B                                       | 5'(GGAUGUGCACGAUUCGGAUTT)3'  |  |
| Smad5A                                       | 5'(GCAAUACAAUGAUCCCUCATT)3'  |  |
| Smad5B                                       | 5'(GGUUUGCUCUCAAAUGUUATT)3'  |  |
| TGFβR3                                       | 5'(GGAAGUAAAUCUACUUGAATT)3'  |  |
| Scrambled<br>high GC content (62%)           | 5'(AGACTGTGCGGTGCTCTGTCC)3'  |  |
| Scrambled<br>medium GC content (38%)         | 5'(CTCCTUGTCAATTTACCGCTT)3'  |  |
| Scrambled<br>low GC content (29%)            | 5'(AAAAGGAUCUGAUACGUATT)3'   |  |

| Supplemental Table 3. Primer pairs |                          |                           |
|------------------------------------|--------------------------|---------------------------|
| Target                             | Forward (5'→3')          | Reverse (5'→3')           |
| Smad4                              | GTGCCACAGACAGATGCAACAACA | TTTGACGAAGCTCATGCGGAGGAT  |
| ALK5                               | ACCAGAGTGGCGTGTTAAGAAGGT | TGC ACAGAAAGGACCCAAAGCAAC |
| GAPDH                              | GGGCACGCCATCACTATCTTCC   | GAGGGGCCATCCACCGTCTT      |
| Smad1                              | CTGCTCTCCAATGTTAACCG     | GCATTGAGCGTACACTTCTC      |
| Smad2                              | TTTTGTTTACAGAGCCCCAAC    | ACCCTGATTCACAGCCTGAG      |
| Smad3                              | TGTAAACCAGGGCTTCGA       | AGGTGCAGCTCAATCCA         |
| Smad5                              | ATGTGCACCATCCGAATG       | GGGTGCTTGTGACATCTT        |
| TGFβR3                             | GCTGAAGGCAGCAGCTTTGATTAT | ACATTGGTGATGTGAGGCTCAGGA  |
